# Supplementary material
Source: PubMed Central journal article supplement (PMC4445970)
Supplement: NIHMS692005-supplement-SI_figures.pdf [file NIHMS692005-supplement-SI_figures.pdf]

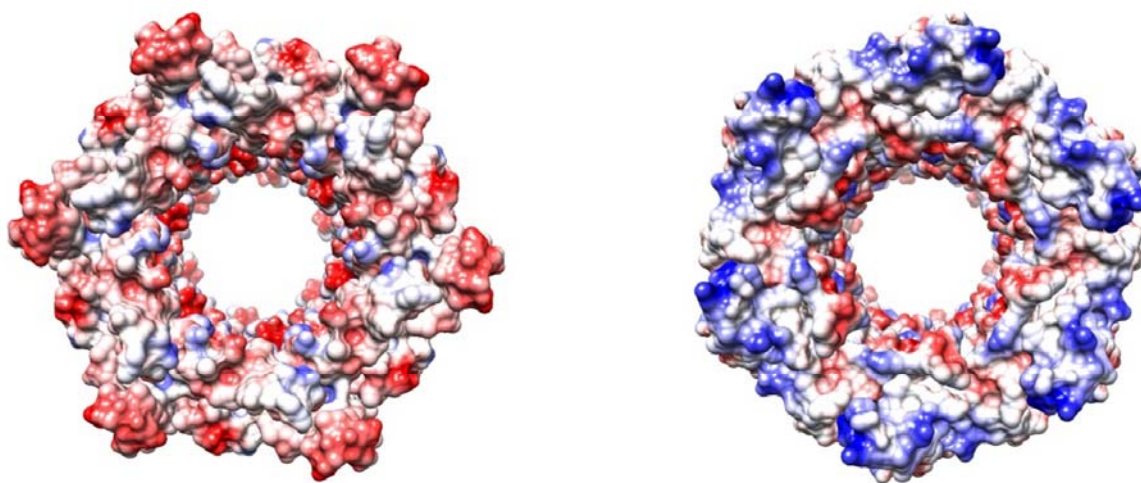

**Supplementary Figure 1**

Surface charge of the top (left) and bottom (right) side of the tube hexamer.

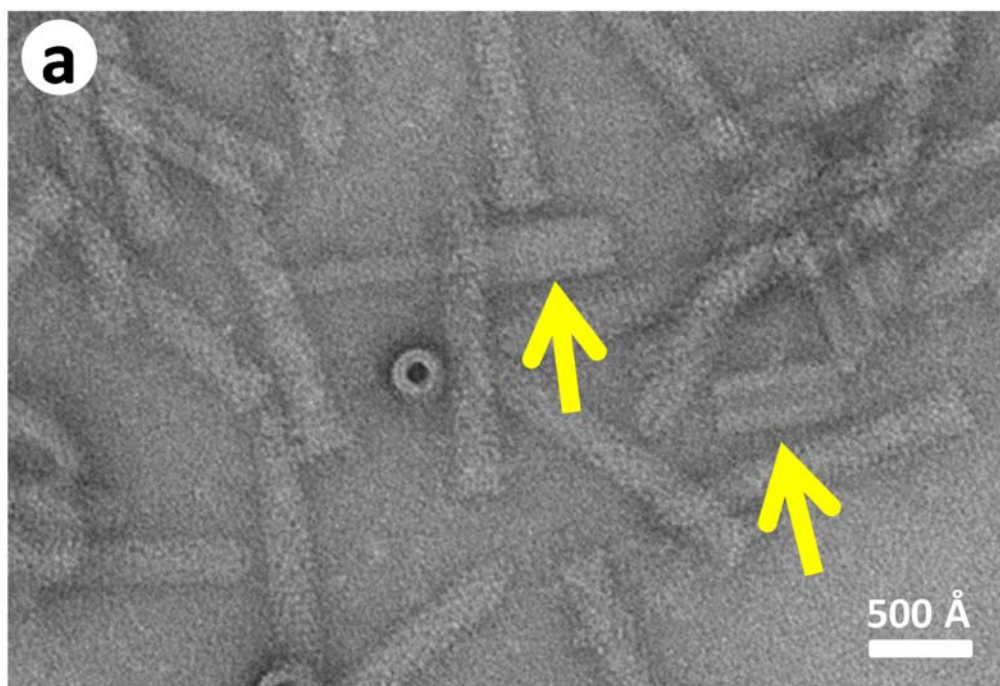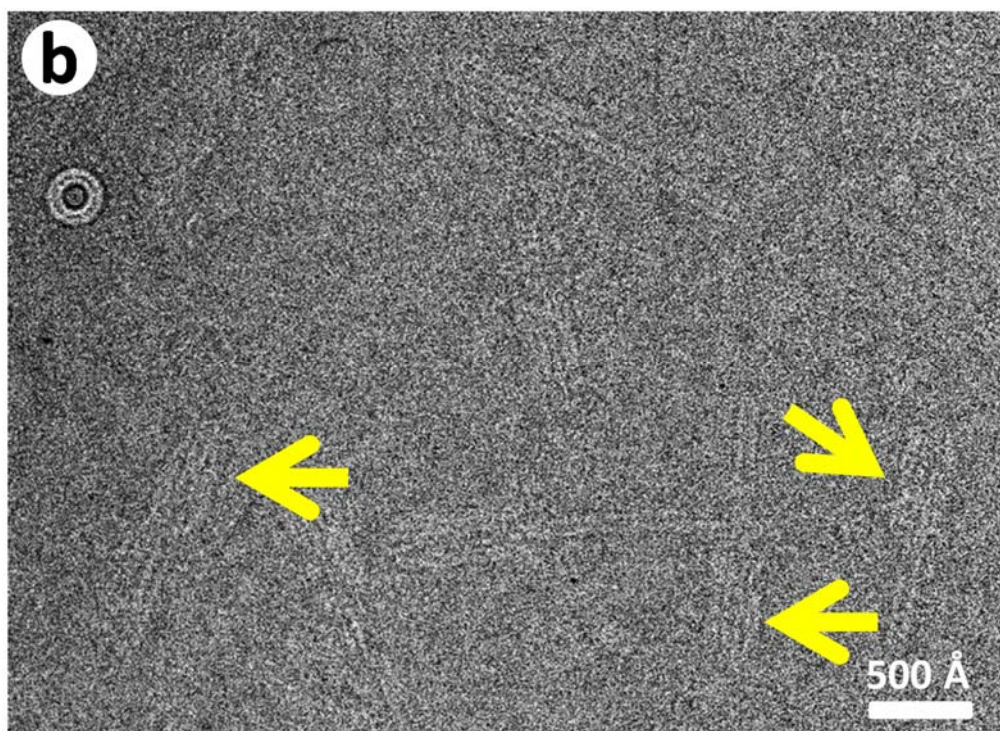

**Supplementary Figure 2**

Electron microscopy images of the postcontraction pyocin R2.

Electron microscopy images of the pyocin R2 embedded in uranyl acetate stain (a) or vitreous ice (b). Arrows point to postcontraction pyocins.

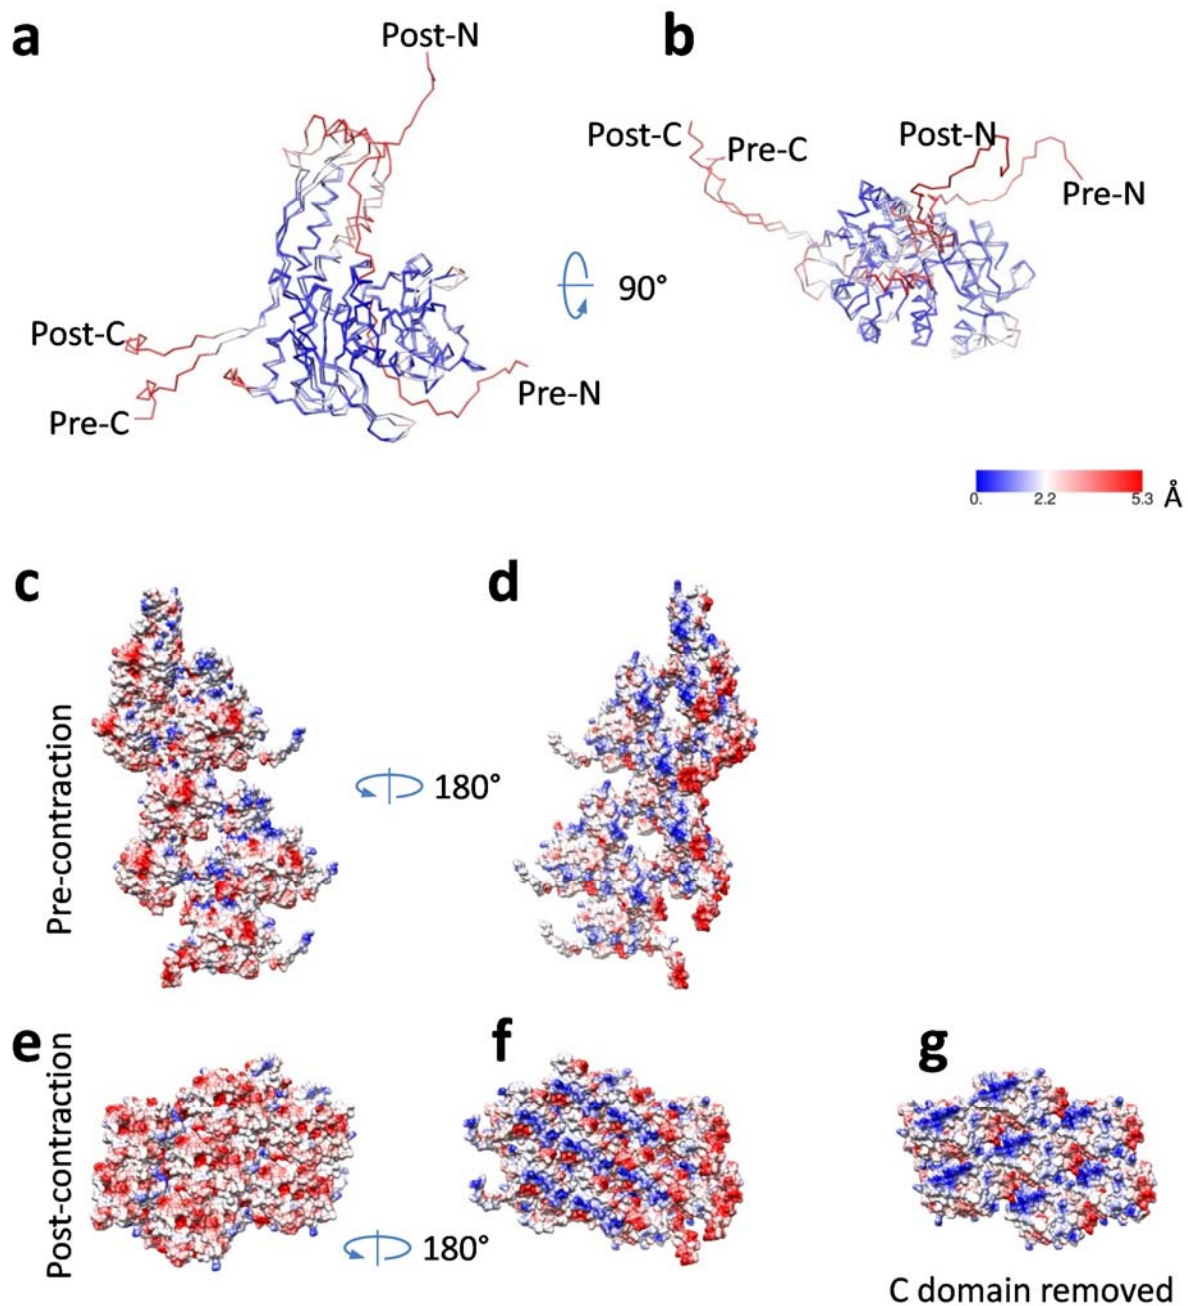

### Supplementary Figure 3

Conformational change during contraction.

(a and b) Superposition of a pre- and a postcontraction sheath subunit showing extend of conformation change in different regions during contraction. (c-g) Surface charge distributions of sheath subunits in their precontraction (c and d) and postcontraction (e-g) states. For clarity, the C domain of sheath is removed in panel g.

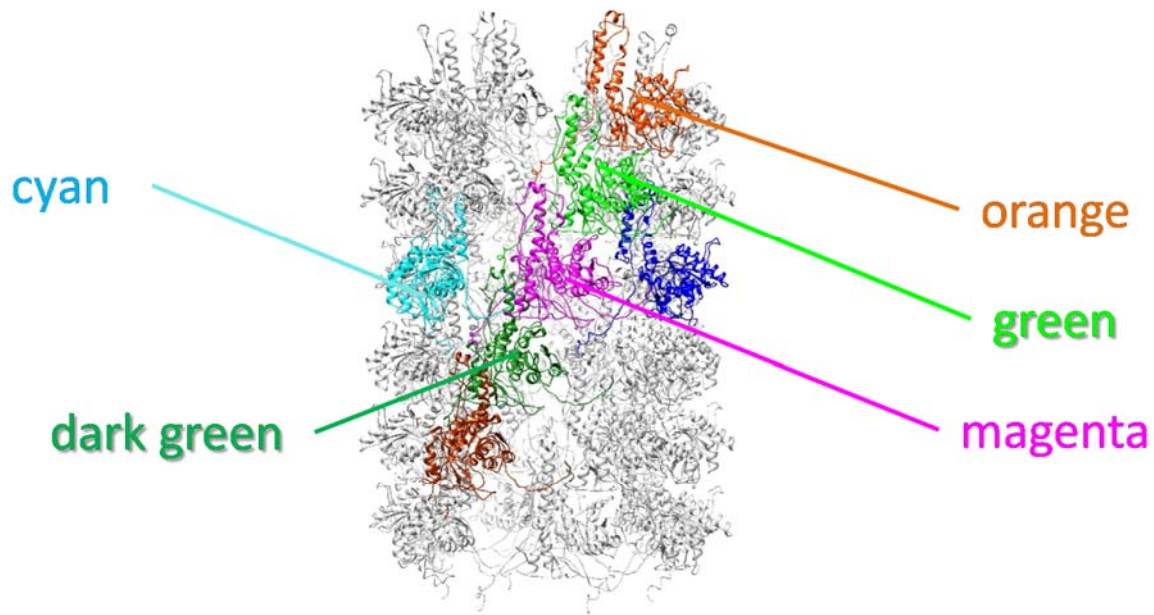

| Pair of subunits  | From residue(s)                                                                                                             | To residue(s)                               |
|-------------------|-----------------------------------------------------------------------------------------------------------------------------|---------------------------------------------|
| Magenta -> green  | Glu107, Asp116                                                                                                              | Arg234, Arg246                              |
|                   | Arg108, Lys149                                                                                                              | Glu237, Glu243                              |
|                   | Arg151                                                                                                                      | Asp240                                      |
|                   | Asp303                                                                                                                      | Lys224                                      |
|                   | $\beta$ -sheet augmentation<br>Green strand Asn367-Thr375 augments Magenta sheet on strand Val353-Phe359                    |                                             |
| Cyan -> magenta   | $\beta$ -sheet augmentation<br>Cyan strand Thr8-Val12 augments Dark-green and Magenta sheet on Magenta strand Pro368-Val372 |                                             |
| Orange -> magenta | Leu379, Leu383                                                                                                              | Pocket formed by magenta and green subunits |

#### Supplementary Figure 4

Key interactions of neighboring sheath subunits in the precontraction state.

There are six neighbors for each sheath subunit. They are colored differently in the top panel; the central subunit is colored magenta. Between the magenta subunit and its six neighbors are interfaces, of which three are unique. Key residues or interactions on these interfaces are tabulated below.

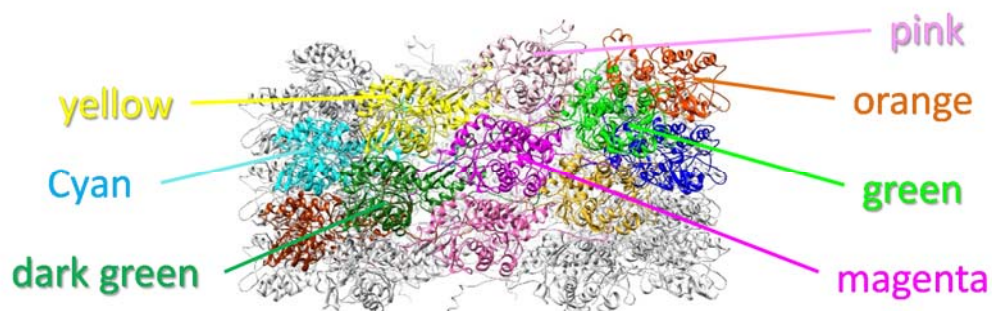

| Pair of subunits  | From residue(s)                                                                                                             | To residue(s)  |
|-------------------|-----------------------------------------------------------------------------------------------------------------------------|----------------|
| Magenta -> green  | Lys118, Arg151                                                                                                              | Asp240         |
|                   | Lys277, Arg283                                                                                                              | Asp376         |
|                   | Lys326                                                                                                                      | Glu381         |
|                   | $\beta$ -sheet augmentation<br>Green strand Asn367-Thr375 augments Magenta sheet on strand Val353-Phe359                    |                |
| Cyan -> magenta   | $\beta$ -sheet augmentation<br>Cyan strand Thr8-Val12 augments Dark-green and Magenta sheet on Magenta strand Pro368-Val372 |                |
| Orange -> magenta | Asp384                                                                                                                      | Lys308, Lys312 |
|                   | Helix 377-383 attaches to a groove formed by magenta and green subunits                                                     |                |
| Magenta -> pink   | Asp275                                                                                                                      | Arg265         |
|                   | Glu148                                                                                                                      | Arg75, Lys227  |
|                   | Lys171                                                                                                                      | Asp261         |
| Magenta -> yellow | Asp275                                                                                                                      | Arg17, Arg304  |
|                   | Lys227                                                                                                                      | Asp13          |
|                   | Arg246                                                                                                                      | Asp54          |
|                   | Glu164                                                                                                                      | Arg120         |

### Supplementary Figure 5

Key interactions of neighboring sheath subunits in the postcontraction state.

There are ten neighbors for each sheath subunit. They are colored differently in the top panel; the central subunit is colored magenta. Between the magenta subunit and its ten neighbors are interfaces, of which five are unique. Key residues or interactions on these interfaces are tabulated below.

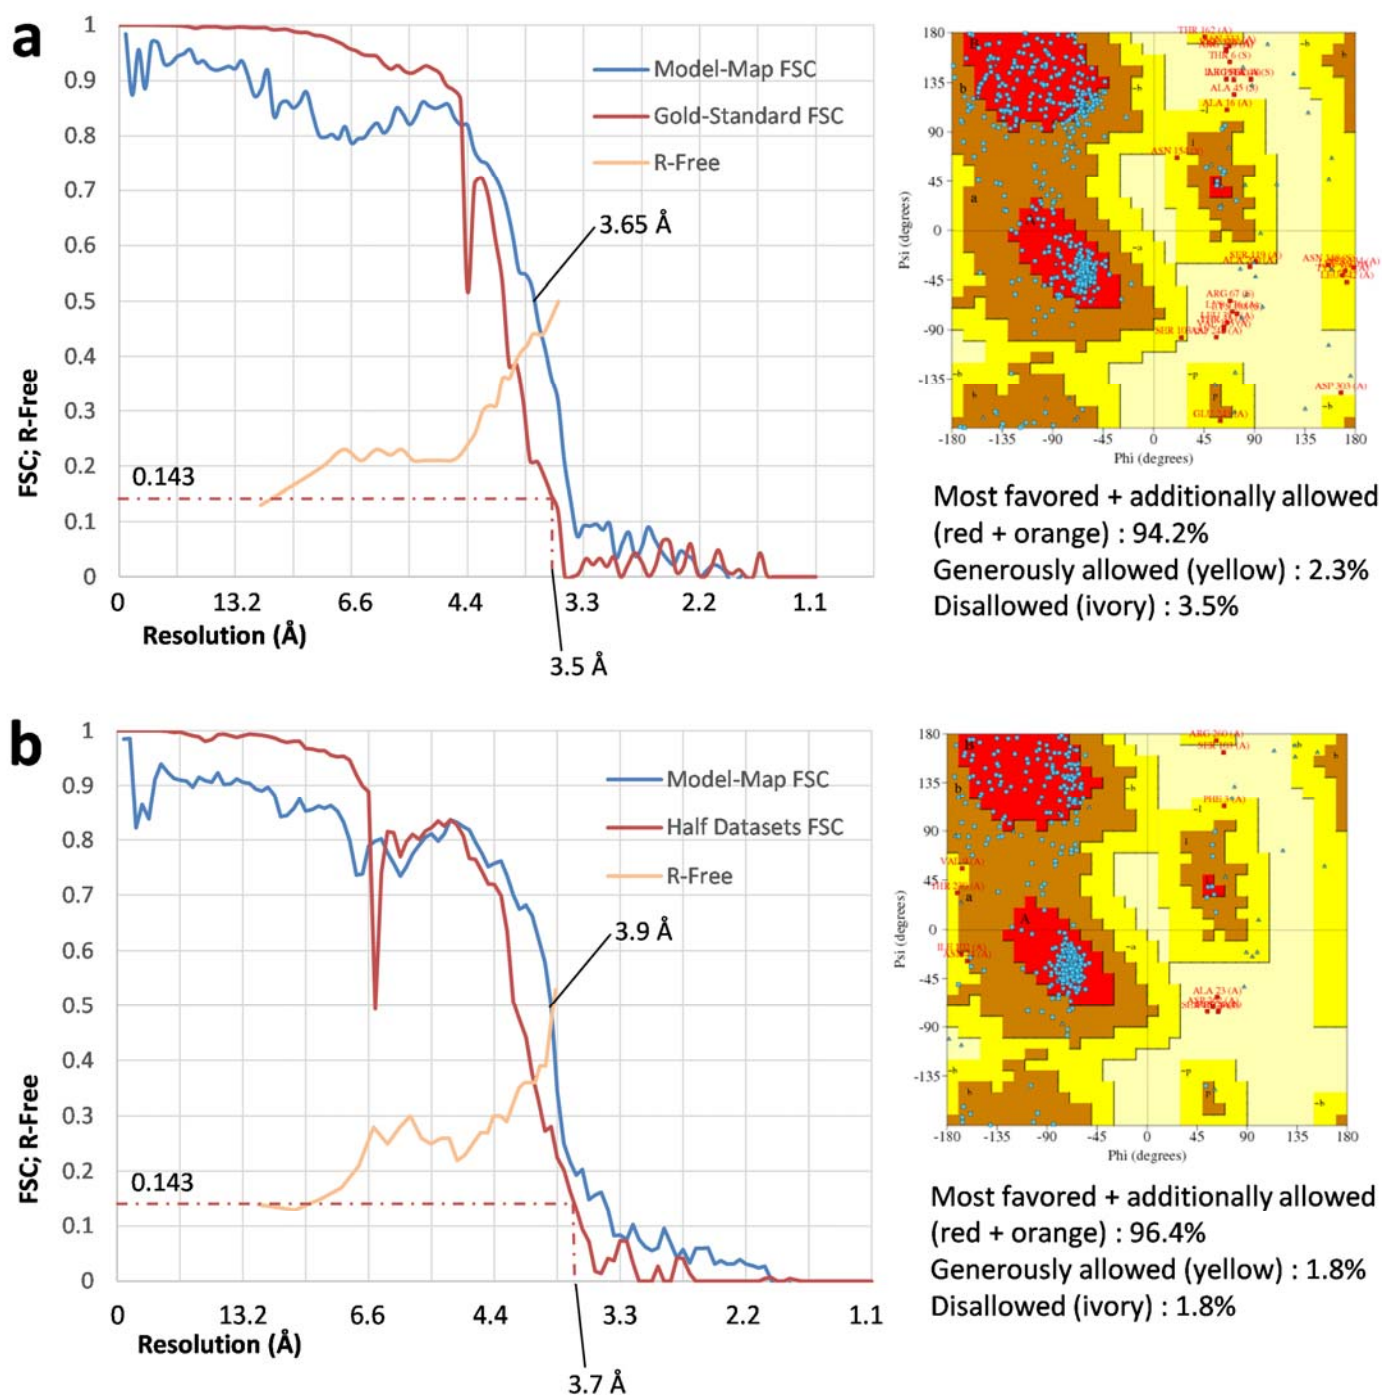

### Supplementary Figure 6

Resolution assessment and validation of the pre- and postcontraction structures.

(left column) Fourier shell correlation curves between maps calculated from half datasets (dark red) and between the atomic model and the map (navy blue) and R-Free factors (orange) are plotted in the same graph versus resolution, for the pre- (a) and postcontraction (b) states, respectively. (right column) Ramachandran plots for the pre- (a) and postcontraction (b) state structures. Occupancy of different areas in each plot is listed at the bottom side of it.
